# Supplementary material for: Micro- and nanoplastic-mediated phototransformation and bioaccessibility of fluorinated liquid crystal monomer in aquatic environments
Source: Royal Society of Chemistry journal article supplement (doi:10.1039/d4en00723a), 2024-12-10
Supplement: d4en00723a1.pdf [file d4en00723a1.pdf]

## Supporting Information

### **Micro- and nanoplastics-mediated phototransformation and bioaccessibility of fluorinated liquid crystal monomer in aquatic environments**

Yiping Feng,<sup>1\*</sup> Jingyi Wu,<sup>1</sup> Wenhao Lao,<sup>1</sup> Weibiao Ye<sup>1</sup>, Danni Guo,<sup>2</sup> Zhu Wang,<sup>2\*</sup>  
Xiaowei Wu,<sup>3\*</sup> and Racliffe Weng Seng Lai<sup>4</sup>

*<sup>1</sup>Guangdong Key Laboratory of Environmental Catalysis and Health Risk Control, School of Environmental Science and Engineering, Institute of Environmental Health and Pollution Control, Guangdong University of Technology, Guangzhou 510006, China*

*<sup>2</sup>Institute of Environmental Research at Greater Bay, Key Laboratory for Water Quality and Conservation of the Pearl River Delta, Ministry of Education, Guangzhou University, Guangzhou 510006, China*

*<sup>3</sup>School of Environmental Science and Engineering, Nanjing University of Information Science and Technology, Nanjing, 210044, China.*

*<sup>4</sup>Department of Ocean Science and Technology, Faculty of Science and Technology, University of Macau, Macau, 999078, China*

\*Corresponding author: Yiping Feng, [ypfeng@gdut.edu.cn](mailto:ypfeng@gdut.edu.cn); Zhu Wang, [wangzhu@gzhu.edu.cn](mailto:wangzhu@gzhu.edu.cn); Xiaowei Wu, [003836@nuist.edu.cn](mailto:003836@nuist.edu.cn)

**Figures:**

**Fig. S1.** XPS spectra of C1s, O1s, N1s of (a) PSNP, (b) PSMP, (c) MCEMP, and (d) PAMP.

**Fig. S2.** Adsorption isotherms for the adsorption of CEB-F on PSMPs and PSNPs fitted by the Langmuir, Freundlich, and Henry model.

**Fig. S3.** FTIR spectra of pure CEB-F, PSNPs, and PSNP adsorption of CEB-F.

**Fig. S4.** XPS survey spectra of CEB-F, PSNPs, and PSNP after adsorption of CEB-F.

**Fig. S5.** XPS spectra of C1s (a), O1s (b), F1s (c) of PSNP, pure CEB-F, and PSNP-CEB-F.

**Fig. S6.** The temperature (a) and (b) the energy versus time curves of the CEB-F and PSNPs during the final NPT MD simulation process.

**Fig. S7.** UV-vis spectra of 5 mg L<sup>-1</sup> of PSNPs in water.

**Fig. S8.** UPLC-Q-Exactive Orbitrap-MS identification for the CEB-F and associated four primary phototransformation products (P1-P4).

**Fig. S9.** Peak areas for CEB-F and associated four primary phototransformation products (P1-P4) when undergoes HPLC spectrum over the reaction time course.

**Tables:**

**Table S1.** Fitness of dynamics models for CEB-F sorption on different plastics.

**Table S2.** Fitness of isotherm parameters for CEB-F sorption on different plastics.

**Table S3.** Primary properties of various water samples.

**Table S4.** Calculated total energy of complex and each molecule and binding energy of CEB-F/PSNPs.

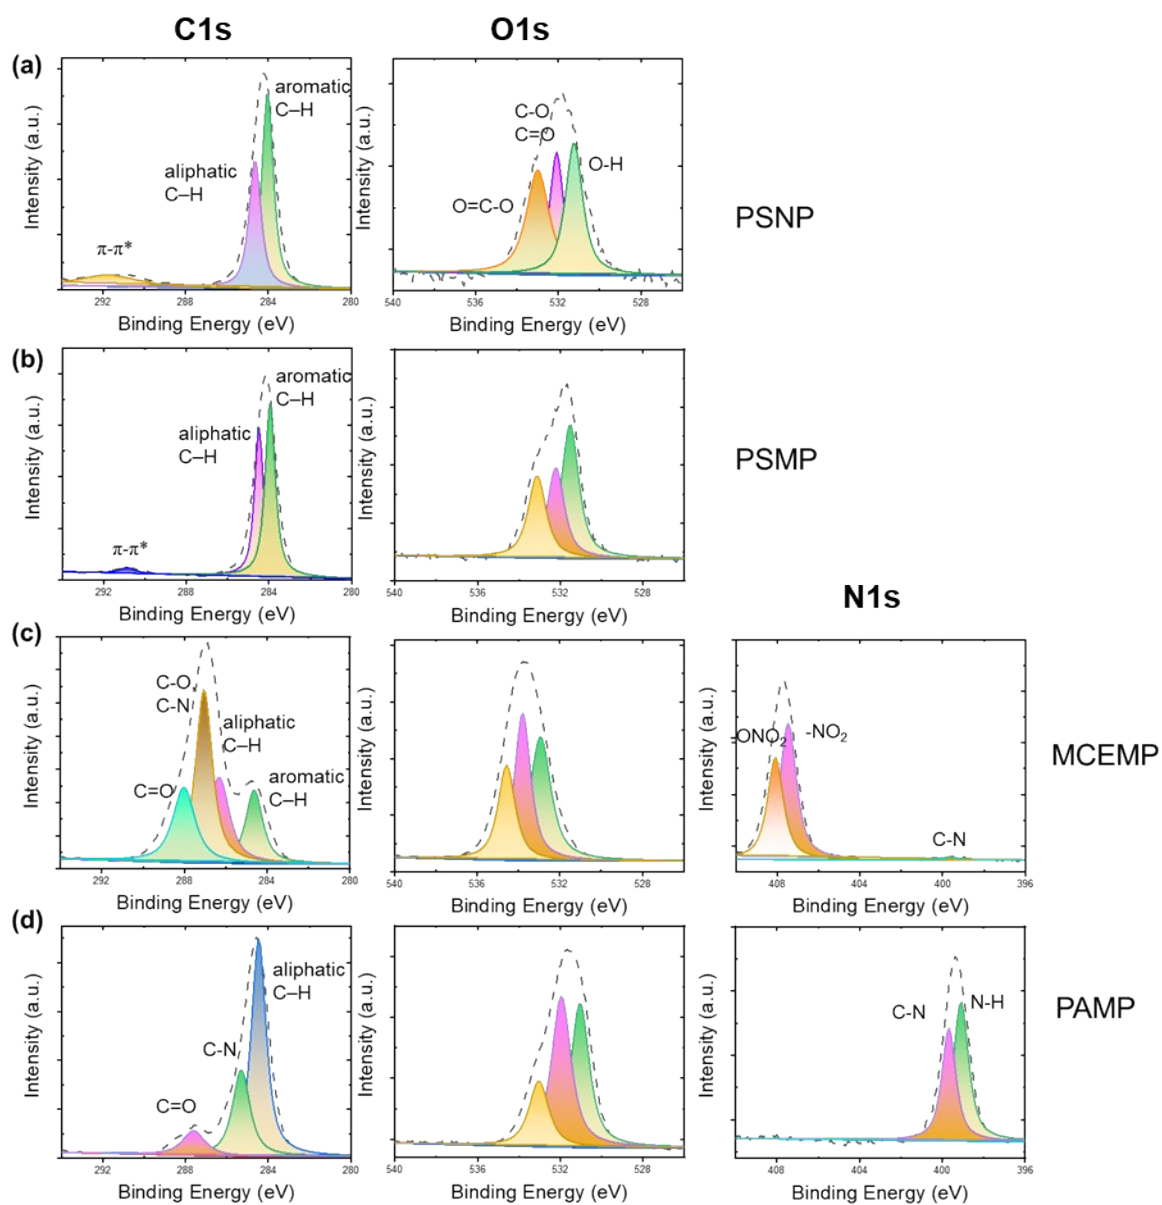

**Fig. S1.** XPS spectra of C1s, O1s, N1s of (a) PSNP, (b) PSMP, (c) MCEMP, and (d) PAMP.

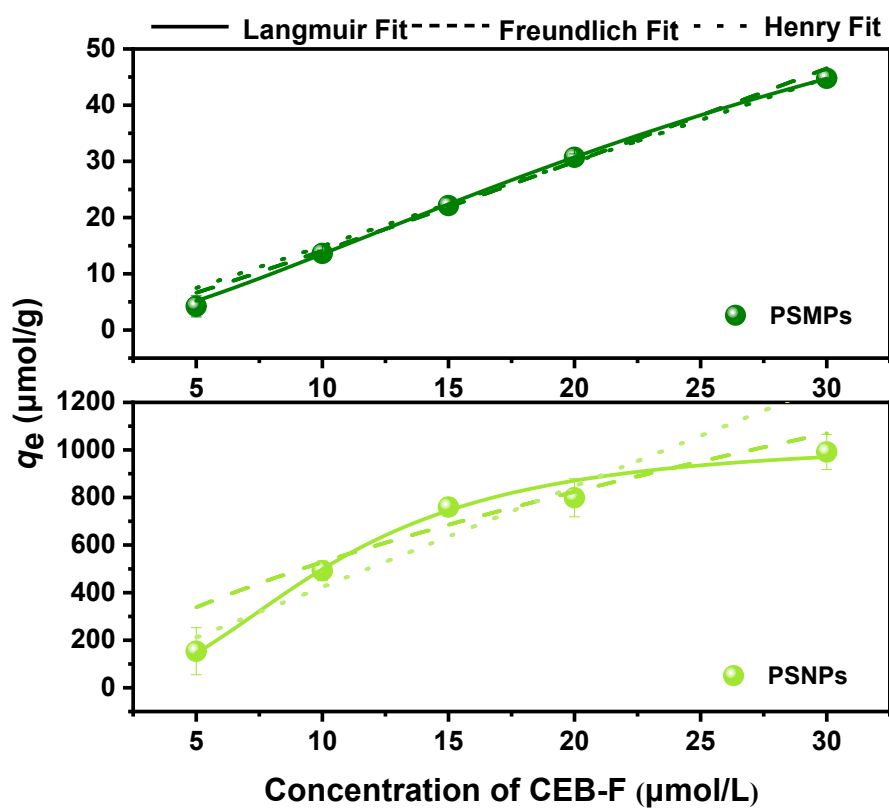

**Fig. S2.** Adsorption isotherms for the adsorption of CEB-F on PSMPs and PSNPs fitted by the Langmuir, Freundlich, and Henry model.

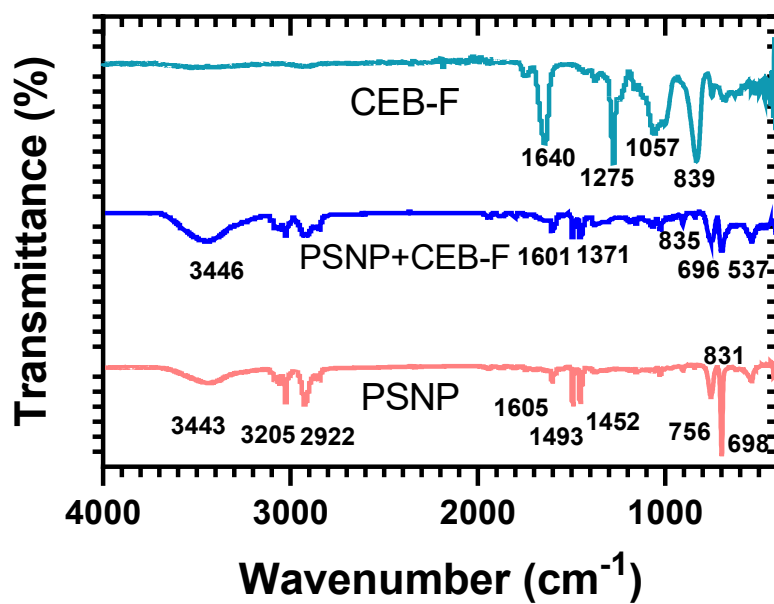

Fig. S3. FTIR spectra of pure CEB-F, PSNPs, and PSNP adsorption of CEB-F.

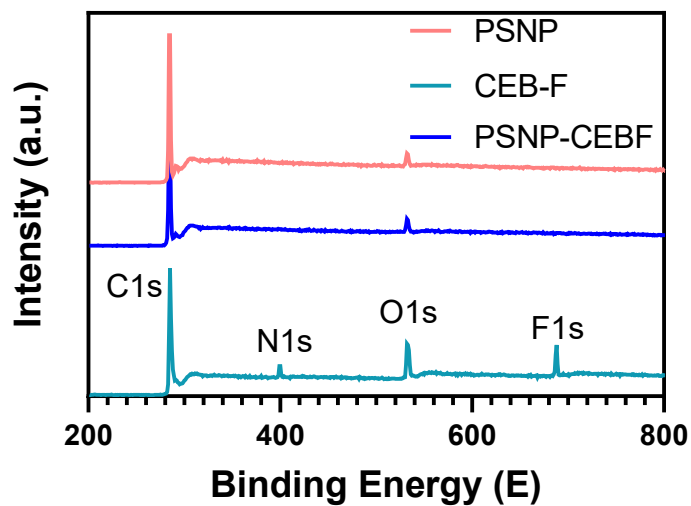

Fig. S4. XPS survey spectra of CEB-F, PSNPs, and PSNP after adsorption of CEB-F.

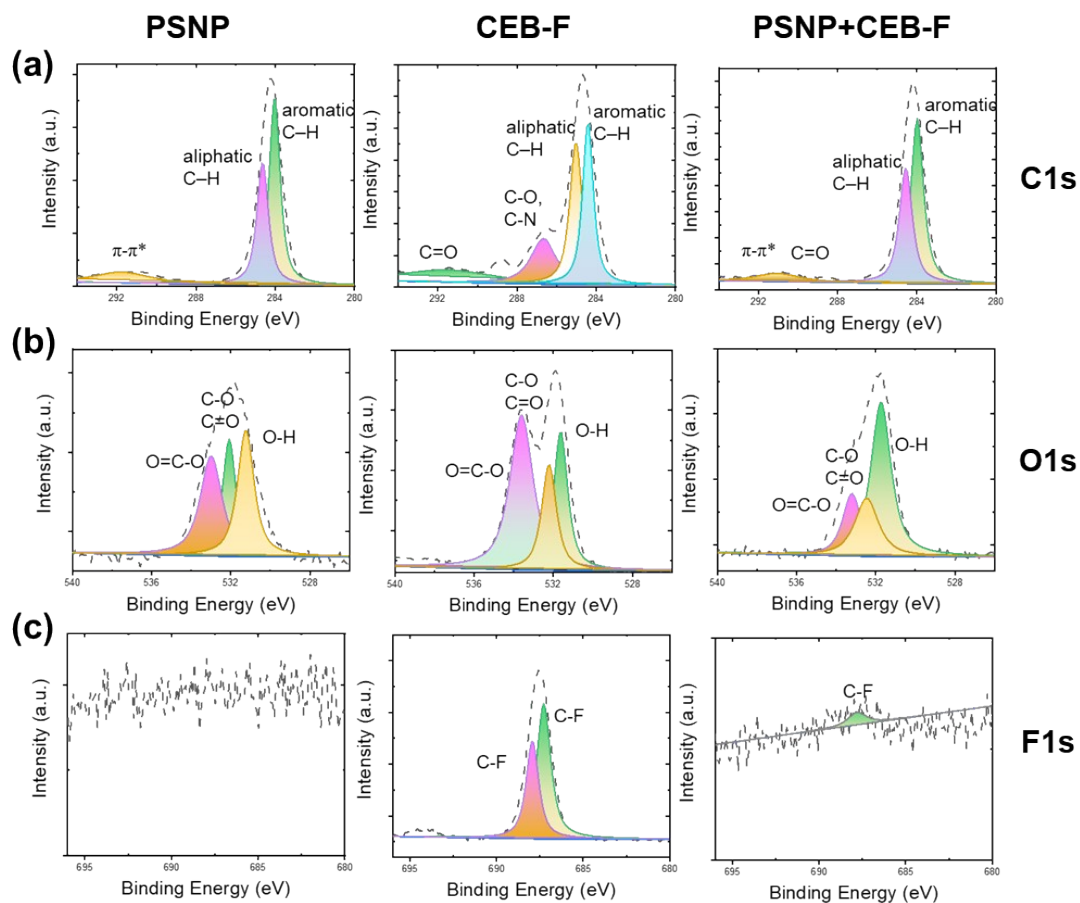

**Fig. S5.** XPS spectra of C1s (a), O1s (b), F1s (c) of PSNP, pure CEB-F, and PSNP-CEB-F.

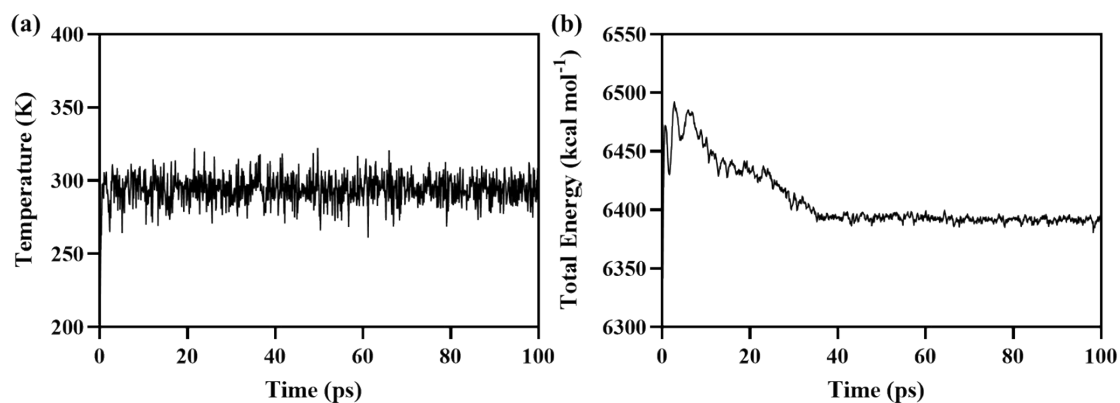

**Fig. S6.** The temperature (a) and (b) the energy versus time curves of the CEB-F and PSNPs during the final NPT MD simulation process.

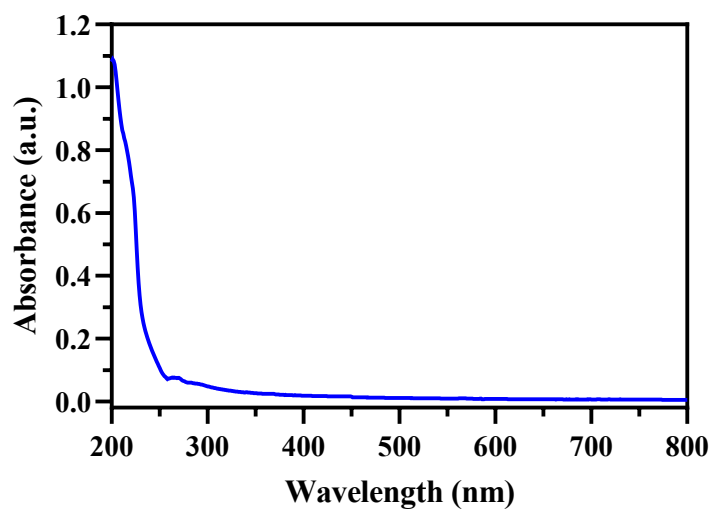

**Fig. S7.** UV-vis spectra of 5 mg L<sup>-1</sup> of PSNPs in water.

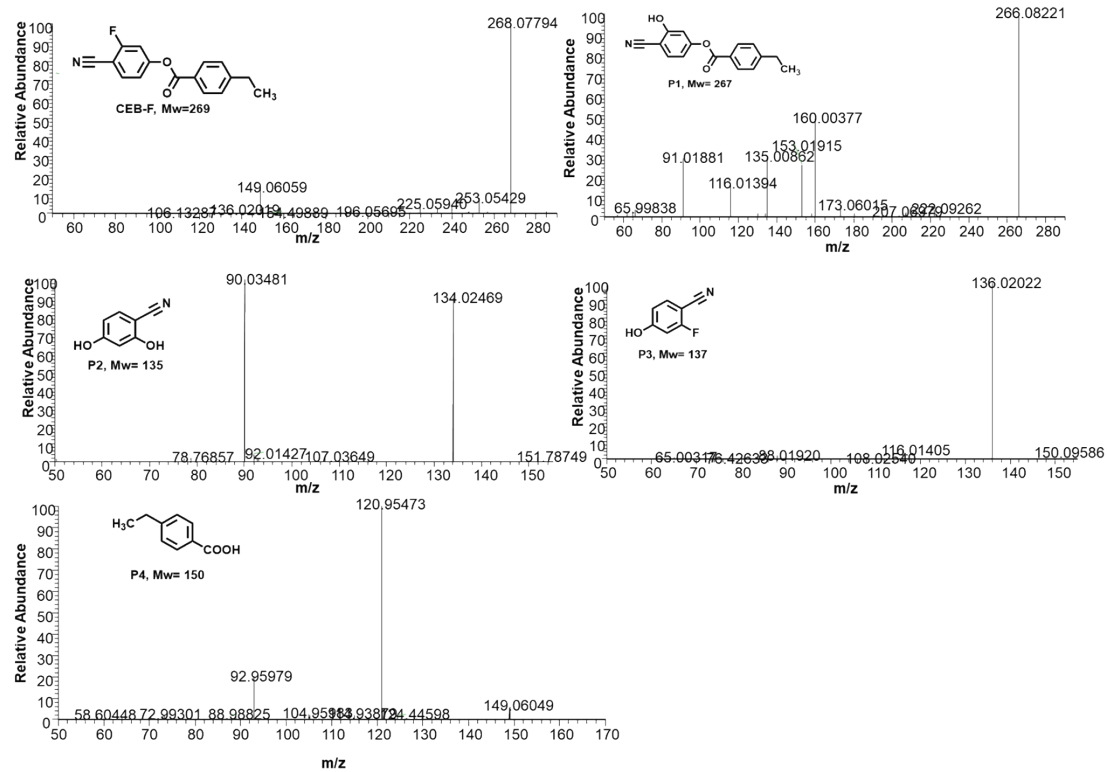

**Fig. S8.** UPLC-Q-Exactive Orbitrap-MS identification for the CEB-F and associated four primary phototransformation products (P1-P4).



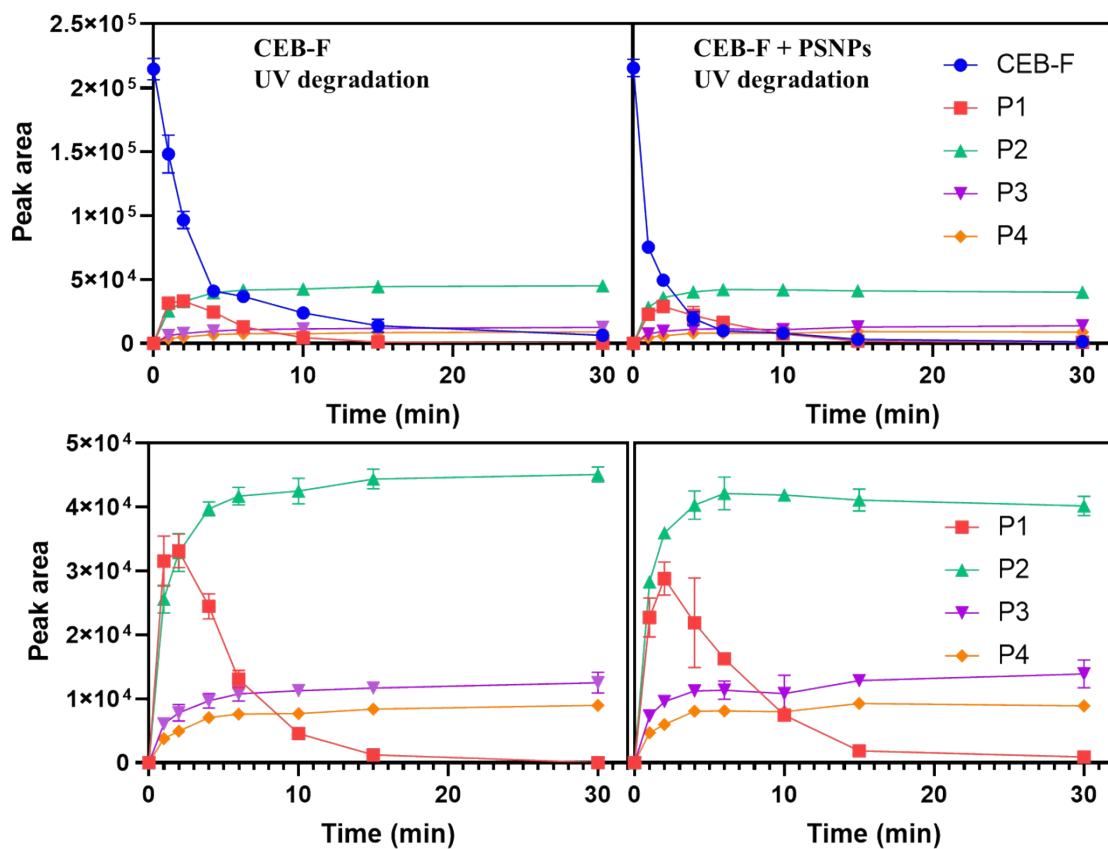

**Fig. S9.** Peak areas for CEB-F and associated four primary phototransformation products (P1-P4) when undergoes HPLC spectrum over the reaction time course.

**Table S1.** Fitness of dynamics models for CEB-F sorption on different plastics.

| plastics | Pseudo-first-order          |                             |        | Pseudo-second-order         |                                 |        | Intraparticle diffusion model |        |         |        |
|----------|-----------------------------|-----------------------------|--------|-----------------------------|---------------------------------|--------|-------------------------------|--------|---------|--------|
|          | $q_e$ ( $\mu\text{mol/g}$ ) | $k_1$ ( $\text{min}^{-1}$ ) | $R^2$  | $q_e$ ( $\mu\text{mol/g}$ ) | $k_2$ ( $\mu\text{mol/g/min}$ ) | $R^2$  | $k_1$                         | $C_1$  | $k_2$   | $C_2$  |
| MCEMP    | 10.8453                     | 0.0193                      | 0.9792 | 13.0914                     | 0.0017                          | 0.9444 | 1.0251                        | 1.3188 | -0.1522 | 12.636 |
| PAMP     | 6.9769                      | 0.0062                      | 0.9919 | 9.6208                      | 0.0005                          | 0.9915 | 0.3961                        | 0.7374 | 0.1764  | 2.6603 |
| PSMP     | 14.1503                     | 0.6609                      | 0.9977 | 14.3319                     | 0.0914                          | 0.9806 | 3.2035                        | 5.1871 | 0.0174  | 13.8   |
| PSNP     | 589.4106                    | 0.0570                      | 0.9969 | 672.9721                    | 0.0009                          | 0.0796 | 81.087                        | 18.932 | -0.8264 | 589.24 |

**Table S2.** Fitness of isotherm parameters for CEB-F sorption on different plastics.

| Plastics | Langmuir                           |                                       | Freundlich |                                                                                                |        | Henry  |                           |        |
|----------|------------------------------------|---------------------------------------|------------|------------------------------------------------------------------------------------------------|--------|--------|---------------------------|--------|
|          | $q_{max}$<br>( $\mu\text{mol/g}$ ) | $k_L$<br>( $\text{L}/\mu\text{mol}$ ) | $R^2$      | $k_F$<br>( $\mu\text{mol/g}$ ) $\cdot$ ( $\mu\text{mol/L}$ ) <sup>-<br/><math>1/n</math></sup> | $1/n$  | $R^2$  | $k_D$<br>( $\text{L/g}$ ) | $R^2$  |
| PSMP     | 95.1760                            | 0.0049                                | 0.9996     | 1.1496                                                                                         | 1.0882 | 0.9928 | 1.4949                    | 0.9978 |
| PSNP     | 1037.3882                          | 0.0029                                | 0.9851     | 120.3109                                                                                       | 0.6425 | 0.8708 | 42.3969                   | 0.9655 |

**Table S3.** Primary properties of various water samples.

| Parameter          | Unit                 | Pearl River<br>water | Tap water | WWTP effluent<br>water | South China<br>Sea water |
|--------------------|----------------------|----------------------|-----------|------------------------|--------------------------|
| pH                 | -                    | 7.37                 | 7.28      | 7.03                   | 8.15                     |
| TOC                | $\text{mg L}^{-1}$   | 4.123                | 1.037     | 5.239                  | 1.235                    |
| $\text{Na}^+$      | $\text{mg L}^{-1}$   | 17.88                | 12.07     | 39.54                  | 11289                    |
| $\text{K}^+$       | $\text{mg L}^{-1}$   | 5.01                 | 3.52      | 11.37                  | 403                      |
| $\text{Cu}^{2+}$   | $\mu\text{g L}^{-1}$ | 0.83                 | /         | 0.62                   | 47.22                    |
| $\text{Mg}^{2+}$   | $\text{mg L}^{-1}$   | 4.07                 | 2.11      | 8.24                   | 1507                     |
| $\text{Al}^{3+}$   | $\mu\text{g L}^{-1}$ | 5.77                 | 18.9      | 10.58                  | 4.31                     |
| $\text{Cl}^-$      | $\text{mg L}^{-1}$   | 15.62                | 12.37     | 51.24                  | 19387                    |
| $\text{HCO}_3^-$   | $\text{mg L}^{-1}$   | 5.13                 | 2.87      | 3.52                   | 6.57                     |
| $\text{SO}_4^{2-}$ | $\text{mg L}^{-1}$   | 29.54                | 17.39     | 42.57                  | 3305                     |

**Table S4.** Calculated total energy of complex and each molecule and binding energy of CEB-F/PSNPs.

|          | Total energy (kcal mol <sup>-1</sup> ) | Binding energy (kcal mol <sup>-1</sup> ) |
|----------|----------------------------------------|------------------------------------------|
| PS       | 6101.0632                              | -                                        |
| CEB-F    | 39.2836                                | -                                        |
| CEB-F-PS | 6091.9393                              | -48.4075                                 |
